# Supplementary material for: Transcriptome Analysis Provides Insights into Copulation, Fertilization, and Gestation in Sebastes schlegelii
Source: MDPI journal article supplement (doi:10.3390/genes13101812), 2022-10-07
Supplement: s1 [file s1]

Supplementary-Table S1 Reproduction-related DEGs at different stages

| Unigene name        | Gene symbol    | Padj     | Log2 (fold)     | Expression quantity | Trend |
|---------------------|----------------|----------|-----------------|---------------------|-------|
| evm.TU.group18.1135 | <i>adra2a</i>  | 0.017127 | lnf             | IIIIV-VS-II         | up    |
| evm.TU.group19.1125 | <i>uts2r</i>   | 0.016681 | lnf             | IIIIV-VS-II         | up    |
| evm.TU.group22.516  | <i>chrn2</i>   | 0.035585 | lnf             | IIIIV-VS-II         | up    |
| evm.TU.group4.285   | <i>cyp19a1</i> | 0.018537 | lnf             | IIIIV-VS-II         | up    |
| evm.TU.group5.88    | <i>npbwr1</i>  | 0.047532 | lnf             | IIIIV-VS-II         | up    |
| evm.TU.group6.1217  | <i>ghsr</i>    | lnf      | 1.2298E-15      | IIIIV-VS-II         | up    |
| evm.TU.group9.1070  | <i>fgf16</i>   | 9.2794   | 2.537E-20       | IIIIV-VS-II         | up    |
| evm.TU.group0.572   | <i>itr</i>     | 7.08     | 6.8037E-06      | IIIIV-VS-II         | up    |
| evm.TU.group19.455  | <i>star</i>    | 6.9532   | 4.7244E-33      | IIIIV-VS-II         | up    |
| evm.TU.group4.284   | <i>cyp19a2</i> | 6.5031   | 3.5787E-06      | IIIIV-VS-II         | up    |
| evm.TU.group19.374  | <i>fshr</i>    | 6.3578   | 3.5924E-39      | IIIIV-VS-II         | up    |
| evm.TU.group16.385  | <i>mmd2</i>    | 6.0584   | 1.1661E-09      | IIIIV-VS-II         | up    |
| evm.TU.group7.357   | <i>hsd17b3</i> | 6.029    | 0.00001664      | IIIIV-VS-II         | up    |
| evm.TU.group5.65    | <i>opr11</i>   | 5.6587   | 0.0025566       | IIIIV-VS-II         | up    |
| evm.TU.group4.398   | <i>cyp11a1</i> | 5.4765   | 1.006E-21       | IIIIV-VS-II         | up    |
| evm.TU.group3.816   | <i>amh</i>     | 5.2263   | 8.4033E-34      | IIIIV-VS-II         | up    |
| evm.TU.group12.748  | <i>fgfr2</i>   | 5.169    | 5.5984E-37      | IIIIV-VS-II         | up    |
| evm.TU.group17.556  | <i>esr1</i>    | 4.8374   | 1.0098E-35      | IIIIV-VS-II         | up    |
| evm.TU.group13.335  | <i>thbd</i>    | 4.5722   | 2.2065E-11      | IIIIV-VS-II         | up    |
| evm.TU.group23.295  | <i>vegfc</i>   | 4.5107   | 9.7747E-09      | IIIIV-VS-II         | up    |
| evm.TU.group9.1192  | <i>vegfa</i>   | 4.3171   | 2.6437E-09      | IIIIV-VS-II         | up    |
| evm.TU.group1.931   | <i>gnrhr2</i>  | 4.2187   | 0.00003136<br>3 | IIIIV-VS-II         | up    |
| evm.TU.group12.557  | <i>lhgr</i>    | 4.2146   | 2.9407E-17      | IIIIV-VS-II         | up    |
| evm.TU.group3.487   | <i>ptger3</i>  | 4.089    | 5.8082E-07      | IIIIV-VS-II         | up    |
| evm.TU.group21.675  | <i>per2</i>    | 4.066    | 1.6954E-33      | IIIIV-VS-II         | up    |
| Novel01696          | <i>sstr2</i>   | lnf      | 0.0054441       | IIIIV-VS-III        | up    |
| evm.TU.group18.1110 | <i>adra2c</i>  | lnf      | 0.049642        | IIIIV-VS-III        | up    |
| evm.TU.group4.284   | <i>cyp19a2</i> | 7.2324   | 6.1346E-10      | IIIIV-VS-III        | up    |
| evm.TU.group19.455  | <i>star</i>    | 6.8959   | 4.9446E-45      | IIIIV-VS-III        | up    |
| evm.TU.group1.343   | <i>cyp19a1</i> | 6.2384   | 1.1447E-61      | IIIIV-VS-III        | up    |
| evm.TU.group0.572   | <i>itr</i>     | 5.4764   | 2.5578E-06      | IIIIV-VS-III        | up    |
| evm.TU.group12.557  | <i>lhgr</i>    | 5.0818   | 5.0522E-26      | IIIIV-VS-III        | up    |
| evm.TU.group1.931   | <i>gnrhr2</i>  | 4.5862   | 2.1034E-07      | IIIIV-VS-III        | up    |
| evm.TU.group21.34   | <i>cyp17a1</i> | 4.4207   | 0.0010516       | IIIIV-VS-III        | up    |
| evm.TU.group7.357   | <i>hsd17b3</i> | 4.1668   | 0.00001173      | IIIIV-VS-III        | up    |
| evm.TU.group2.440   | <i>cxcl12</i>  | 4.0685   | 7.883E-27       | IIIIV-VS-III        | up    |
| evm.TU.group13.879  | <i>5ht1b</i>   | lnf      | 0.00032065      | V_1-VS-II           | up    |
| evm.TU.group6.1217  | <i>ghsr</i>    | lnf      | 0.00002367<br>5 | V_1-VS-II           | up    |

|                                           |                |                 |                 |              |      |
|-------------------------------------------|----------------|-----------------|-----------------|--------------|------|
| evm.TU.group7.357                         | <i>hsd17b3</i> | 7.9548          | 0.00003764<br>2 | V_1-VS-II    | up   |
| evm.TU.group16.385                        | <i>mmd2</i>    | 7.473           | 1.9263E-17      | V_1-VS-II    | up   |
| evm.TU.group9.1227_e<br>vm.TU.group9.1228 | <i>slc5a7</i>  | 7.4473          | 3.8504E-17      | V_1-VS-II    | up   |
| evm.TU.group13.940                        | <i>ghsr</i>    | 7.2135          | 0.009761        | V_1-VS-II    | up   |
| evm.TU.group16.1286                       | <i>aqp8</i>    | 7.0565          | 2.6458E-06      | V_1-VS-II    | up   |
| evm.TU.group19.455                        | <i>star</i>    | 7.0448          | 0.0059265       | V_1-VS-II    | up   |
| evm.TU.group21.320                        | <i>plac8</i>   | 6.5904          | 0.000696        | V_1-VS-II    | up   |
| evm.TU.group17.556                        | <i>esr1</i>    | 6.1698          | 4.9387E-77      | V_1-VS-II    | up   |
| evm.TU.group4.398                         | <i>cyp11a1</i> | 6.1618          | 1.3857E-13      | V_1-VS-II    | up   |
| evm.TU.group12.537                        | <i>lhcg</i>    | 5.4383          | 7.1732E-24      | V_1-VS-II    | up   |
| evm.TU.group1.247                         | <i>tspan4</i>  | 5.3756          | 9.7397E-17      | V_1-VS-II    | up   |
| evm.TU.group19.374                        | <i>fshr</i>    | 5.2995          | 4.6981E-09      | V_1-VS-II    | up   |
| evm.TU.group1.456                         | <i>aqp9</i>    | 5.225           | 0.0006894       | V_1-VS-II    | up   |
| evm.TU.group4.503                         | <i>igf1r</i>   | 5.201           | 0.00002973<br>9 | V_1-VS-II    | up   |
| evm.TU.group6.797                         | <i>bmp2</i>    | 5.1953          | 3.1102E-12      | V_1-VS-II    | up   |
| evm.TU.group5.1343                        | <i>ctgf</i>    | 5.0098          | 0.046568        | V_1-VS-II    | up   |
| evm.TU.group21.34                         | <i>cyp17a1</i> | 4.8139          | 6.3392E-17      | V_1-VS-II    | up   |
| evm.TU.group17.761                        | <i>esrrg</i>   | 4.602           | 0.045916        | V_1-VS-II    | up   |
| evm.TU.group4.68                          | <i>igf2</i>    | 4.5985          | 5.9372E-<br>24  | V_1-VS-II    | up   |
| evm.TU.group6.1235                        | <i>pgr</i>     | 4.5108          | 2.2961E-19      | V_1-VS-II    | up   |
| evm.TU.group4.1088                        | <i>zpl</i>     | 4.0771          | 1.3931E-06      | V_1-VS-II    | up   |
| evm.TU.group19.1023                       | <i>dmc1</i>    | -4.9351         | 5.0971E-08      | V_1-VS-II    | down |
| evm.TU.group18.1135                       | <i>adra2a</i>  | 6.6301          | 0.0032896       | V_1-VS-III   | up   |
| evm.TU.group18.1092                       | <i>adra2c</i>  | Inf             | 0.038904        | V_1-VS-III   | up   |
| evm.TU.group19.455                        | <i>star</i>    | 6.9679          | 0.00084422      | V_1-VS-III   | up   |
| evm.TU.group3.490                         | <i>vtg</i>     | 6.3648          | 0.0052531       | V_1-VS-III   | up   |
| evm.TU.group8.116                         | <i>trhr</i>    | 5.6285          | 1.6692E-17      | V_1-VS-III   | up   |
| evm.TU.group16.1160                       | <i>nrb</i>     | 5.0238          | 0.0055353       | V_1-VS-III   | up   |
| evm.TU.group7.624                         | <i>aqp3</i>    | 8.8494          | 3.7937E-06      | V_2-VS-II    | up   |
| evm.TU.group10.738                        | <i>slc43a2</i> | 7.5253          | 4.3848E-33      | V_2-VS-II    | up   |
| evm.TU.group21.320                        | <i>plac8</i>   | 5.4464          | 9.8576E-06      | V_2-VS-II    | up   |
| evm.TU.group5.557                         | <i>pga</i>     | 5.3981          | 0.00003718<br>2 | V_2-VS-II    | up   |
| evm.TU.group2.440                         | <i>cxcl12</i>  | 0.019531        | 4.6699          | V_2-VS-II    | up   |
| evm.TU.group5.1229                        | <i>gos2</i>    | 0.022529        | 4.6682          | V_2-VS-II    | up   |
| evm.TU.group3.490                         | <i>vtg</i>     | 0.028672        | 4.8528          | V_2-VS-III   | up   |
| evm.TU.group4.460                         | <i>nmb</i>     | 0.00012312      | Inf             | V_2-VS-IIIIV | up   |
| evm.TU.group0.1146                        | <i>slc5a8</i>  | 0.00003013<br>3 | 8.8554          | V_2-VS-IIIIV | up   |

|                    |             |            |         |           |      |
|--------------------|-------------|------------|---------|-----------|------|
| evm.TU.group4.1088 | <i>zpl</i>  | 3.9446E-12 | -7.1991 | LA-VS-V_1 | down |
| evm.TU.group5.557  | <i>pga</i>  | 3.4722E-12 | -6.5038 | LA-VS-V_1 | down |
| evm.TU.group11.261 | <i>zp3</i>  | 8.1221E-15 | -5.2062 | LA-VS-V_1 | down |
| evm.TU.group15.460 | <i>zp4</i>  | 6.7778E-23 | -4.5228 | LA-VS-V_1 | down |
| evm.TU.group17.229 | <i>zp2</i>  | 2.5653E-22 | -4.4441 | LA-VS-V_1 | down |
| evm.TU.group10.821 | <i>zar1</i> | 1.8638E-21 | -4.398  | LA-VS-V_1 | down |
| Novel02618         | <i>hcel</i> | 1.4412E-08 | -4.3445 | LA-VS-V_1 | down |
